# Supplementary material for: Raman and IR spectra of water under graphene nanoconfinement at ambient and extreme pressure–temperature conditions: a first-principles study
Source: Royal Society of Chemistry journal article supplement (doi:10.1039/d3fd00111c), 2023-08-11
Supplement: d3fd00111c1.pdf [file d3fd00111c1.pdf]

**Supporting Information for “Raman and IR spectra of water  
under graphene nanoconfinement at ambient and extreme  
pressure-temperature conditions: a first-principles study”**

Rui Hou,<sup>1,2,\*</sup> Chu Li,<sup>1,2,\*</sup> and Ding Pan<sup>1,3,2,†</sup>

<sup>1</sup>*Department of Physics, Hong Kong University  
of Science and Technology, Hong Kong, China*

<sup>2</sup>*HKUST Shenzhen-Hong Kong Collaborative  
Innovation Research Institute, Shenzhen, China*

<sup>3</sup>*Department of Chemistry, Hong Kong University  
of Science and Technology, Hong Kong, China*

## SUPPLEMENTARY METHODS

We performed the simulations with a time step of 0.24 fs using the SG15 optimized norm-conserving Vanderbilt (ONCV) pseudopotentials [1, 2]. We used a plane-wave kinetic energy cutoff of 65 Ry in the AIMD simulations, and increased the cutoff to 85 Ry when calculating pressure. We controlled the temperature with the Bussi-Donadio-Parrinello thermostat [3], which had a damping factor ( $\tau$ ) of 24.2 fs. Each simulation cell contains 48 water molecules with periodic boundary conditions (see Tab. SI).

We calculated the lateral pressure in the simulation cell using the formula  $P_{\parallel} = (\sigma'_{xx} + \sigma'_{yy})/2$ . To account for the vacuum in the unit cell, we modified the diagonal elements of the computed stress tensor,  $\sigma_{xx}$  and  $\sigma_{yy}$ , with the expression  $\sigma'_{xx/yy} = \sigma_{xx/yy} (L_z/h_z)$ , where  $L_z$  represents the  $z$ -dimension of the unit cell, and  $h_z$  denotes the distance between graphene sheets. Previous studies have utilized this method [4, 5].

We fitted the graphene-oxygen interaction to the diffusion Monte Carlo calculations for water molecules in the two-legged configuration adsorbed on the graphene sheet [6]. The molecular force was applied to the oxygen atoms, and the interaction was modeled using the Morse potential shape:

$$E_b^O(d) = D_e^O \left[ \left( 1 - e^{-a^O(d-d_0^O)} \right)^2 - 1 \right], \quad (\text{S1})$$

where  $D_e^O = 9.55185 \text{ kJ mol}^{-1}$ ,  $a^O = 1.34725 \text{ \AA}^{-1}$ , and  $d_0^O = 3.37265 \text{ \AA}$  [6].

TABLE SI. P-T data of graphene-confined water in the AIMD simulations in Fig. 1. The  $z$  dimension of simulation cells ( $L_z$ ) is fixed at 1.470 nm.

| Confinement | P (GPa)          | T (K) | x(y) dimension (nm) |
|-------------|------------------|-------|---------------------|
| (a)         | $0.52 \pm 0.39$  | 400   | 1.950               |
| (b)         | $9.72 \pm 0.59$  | 1000  | 1.288               |
| (c)         | $20.15 \pm 1.13$ | 1000  | 1.190               |

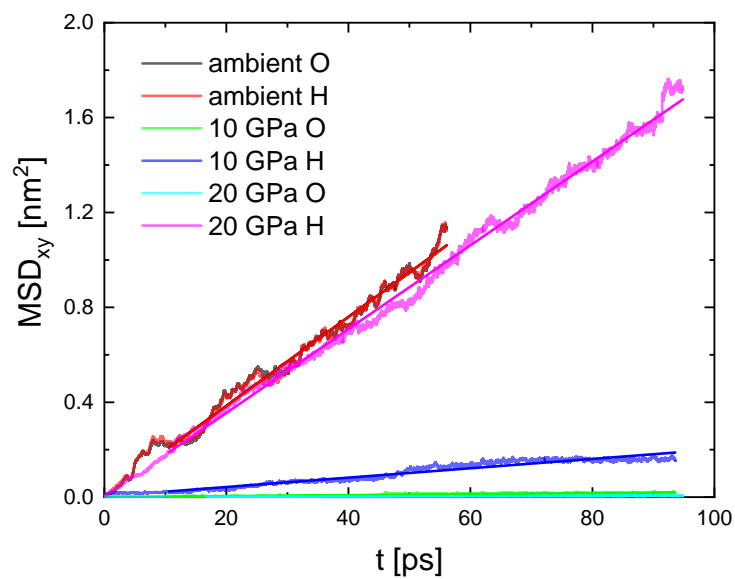

FIG. S1. Mean-squared displacement of oxygen and hydrogen atoms in graphene-confined water at ambient and extreme P-T conditions. The temperature is 1000 K when the pressure is  $\sim 10$  or  $\sim 20$  GPa (see Tab. SI).

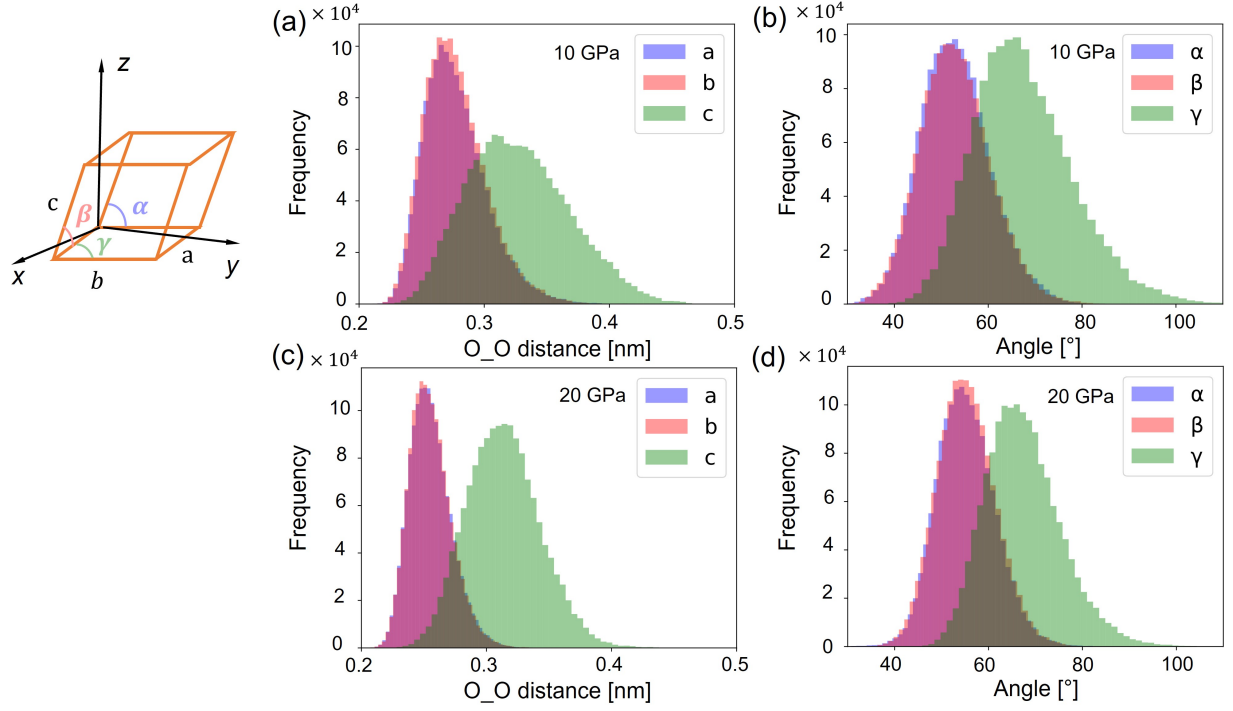

FIG. S2. The oxygen lattices at extreme P-T conditions. The left panels (a and c) show the distribution of the lattice constants. The right panels (b and d) show that distribution of the lattice angles. The temperature is 1000 K (see the main text).

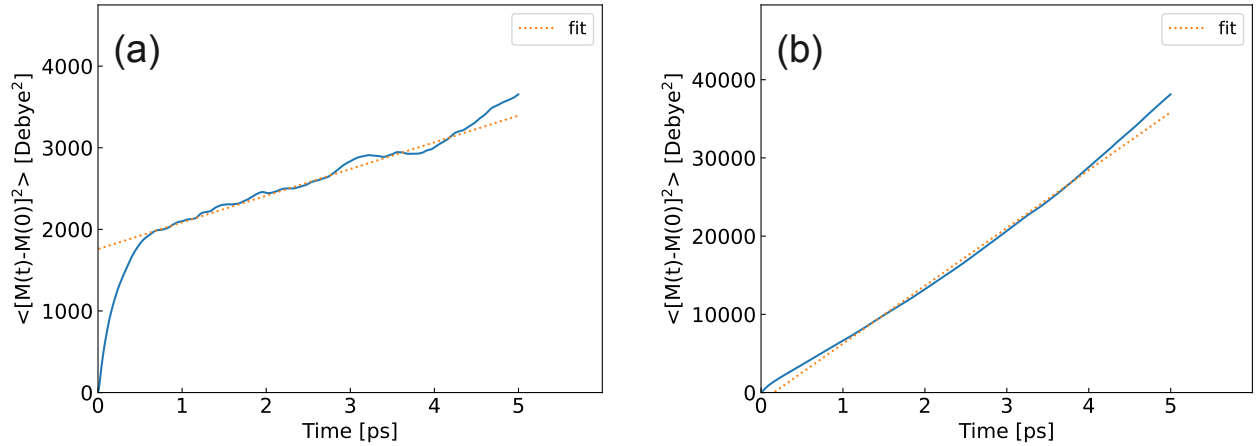

FIG. S3. Time-averaged mean squared displacement of the total dipole moment  $\mathbf{M}$  as a function of separation time at (a)  $\sim 10$  GPa and 1000 K, and (b)  $\sim 20$  GPa and 1000 K.

---

\* These authors contributed equally to this work.

† dingpan@ust.hk

- [1] Hamann, D. R. Optimized norm-conserving vanderbilt pseudopotentials. *Phys. Rev. B* **88**, 085117 (2013).
- [2] Schlipf, M. & Gygi, F. Optimization algorithm for the generation of oncv pseudopotentials. *Comp. Phys. Commun.* **196**, 36–44 (2015).
- [3] Bussi, G., Donadio, D. & Parrinello, M. Canonical sampling through velocity rescaling. *J. Chem. Phys.* **126**, 014101 (2007).
- [4] Chen, J., Schusteritsch, G., Pickard, C. J., Salzmann, C. G. & Michaelides, A. Two dimensional ice from first principles: Structures and phase transitions. *Phys. Rev. Lett.* **116**, 025501 (2016).
- [5] Stolte, N., Hou, R. & Pan, D. Nanoconfinement facilitates reactions of carbon dioxide in supercritical water. *Nat. Commun.* **13**, 5932 (2022).
- [6] Brandenburg, J. G. *et al.* Physisorption of water on graphene: Subchemical accuracy from many-body electronic structure methods. *J. Phys. Chem. Lett.* **10**, 358–368 (2019).
